# Supplementary material
Source: PubMed Central journal article supplement (PMC3231842)

**Supplemental Figure 1- Ectopic cells at the *ptc2*<sup>-/-</sup> juvenile ciliary zone label with markers of differentiated retinal neurons.** Immunohistochemical analysis of *ptc2*<sup>-/-</sup> juvenile retinas revealed cells at the ciliary zone that are positive for the neuronal markers Islet1 (B), ZPR3 (rods, D) and ZPR1 (red/green double cones, F). In wild-type sibling retinas, staining was restricted to the retina (A,C,E). Scale bar: 100um.

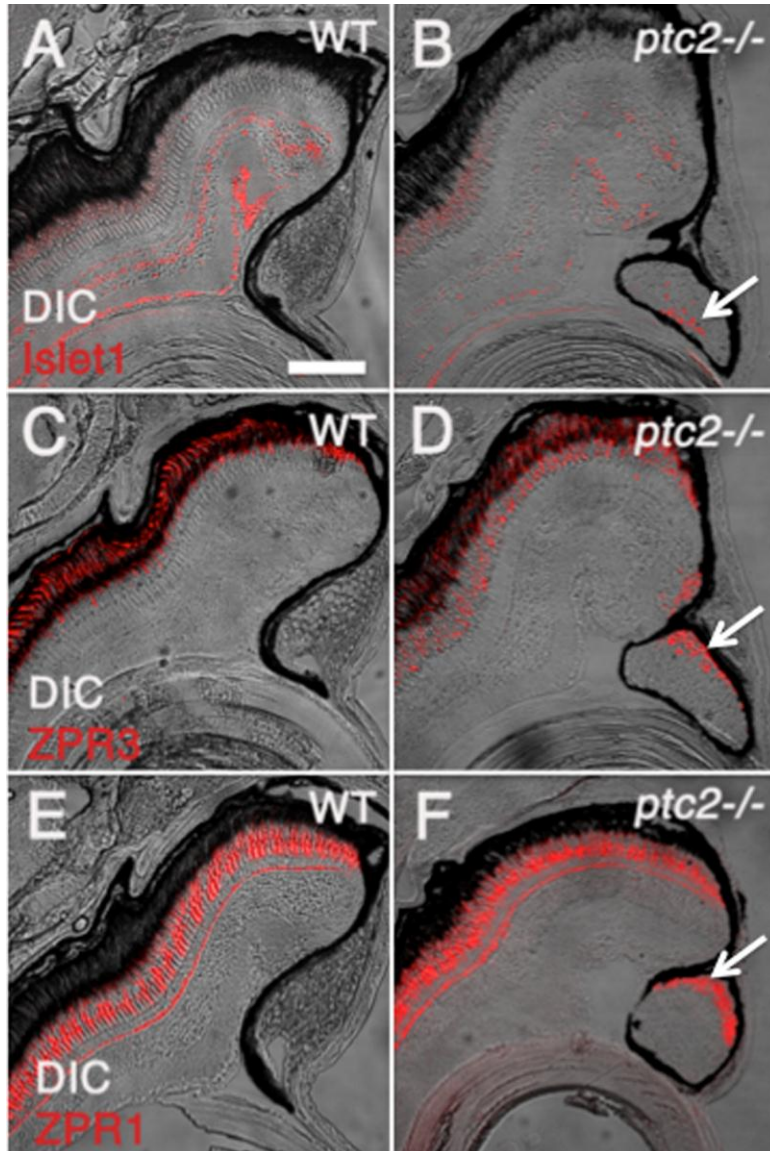

Supplement: 11-8033_z7g999112191sf01.pdf [file 11-8033_z7g999112191sf01.pdf]
